# Supplementary material
Source: PubMed Central journal article supplement (PMC3218795)
Supplement: NIHMS328947-supplement-1.pdf [file NIHMS328947-supplement-1.pdf]

## SUPPLEMENTAL MATERIAL

# PRIMARY PREVENTION OF CVD

## HYPERTENSION

## DYSLIPIDEMIA

### BASIC TREATMENT RECOMMENDATIONS

Smoking Cessation/Reduction (counseling, meds, nicotine replacement)  
Antiplatelet Therapy (Aspirin 81 mg qd) for at risk individuals  
Exercise (30 minutes walking most days of the week; start 10-15 min 3x/week and increase as tolerated)  
Weight Reduction if needed  
Diet (low fat, low cholesterol, plant based, calorie restriction)  
Stress Management

### \*ASPIRIN TREATMENT RECOMMENDATIONS

**WOMEN:** Consider if benefit of ischemic stroke prevention outweighs risk for GI bleed:

**AGE 55-59:** 10 year stroke risk  $\geq$  3%      **AGE 60-69:** 10 year stroke risk  $\geq$  8%      **AGE 70-79:** 10 year stroke risk  $\geq$  11%

**MEN:** Consider if benefit of MI prevention outweighs risk for GI bleed and hemorrhagic stroke:

**AGE 45-59:** 10 year CHD risk  $\geq$  4%      **AGE 60-69:** 10 year CHD risk  $\geq$  9%      **AGE 70-79:** 10 year CHD risk  $\geq$  12%

*The above applies to adults not taking NSAIDs and who do not have upper GI pain or GI ulcer history; based on 2009 USPSTF Recommendations.*

### ADDITIONAL CONDITION-SPECIFIC TREATMENT RECOMMENDATIONS

#### HYPERTENSION

- Medications
  1. Diuretic
  2. ACEI or ARB
  3. CCB
  4. BB

#### MONITOR

- BP
- Lipids
- Weight
- Lifestyle behavior

#### GOALS

BP  $\leq$  139/89 mm Hg  
or  
BP  $\leq$  129/79 mm Hg  
for Renal Disease

#### DYSLIPIDEMIA

- Medications
  1. Statins
  2. Fibrate
  3. Nicotinic Acid
  4. Resins
  5. Ezetimibe

#### MONITOR

- Lipids
- BP
- Weight
- Lifestyle behavior

#### GOALS

LDL  $<$  130 if moderate risk; Non HDL-C  $<$  160  
LDL  $<$  160 if at lower risk; Non HDL-C  $<$  190  
TG  $<$  150 for all

# SECONDARY PREVENTION OF CVD (OR HIGH RISK: DIABETES)

## BASIC TREATMENT RECOMMENDATIONS

Smoking Cessation/Reduction (counseling, meds, nicotine patch)  
Antiplatelet Therapy (ASA 81 mg or Clopidogrel 75 mg qd)  
Exercise (30 minutes walking most days of the week; start 10-15 min 3x/week and increase as tolerated)  
Weight Reduction if needed  
Diet (ADA or low fat, low cholesterol, plant based, calorie restriction)  
Stress Management

## ADDITIONAL CONDITION-SPECIFIC TREATMENT RECOMMENDATIONS

### DIABETES

- Diabetic teaching
- Medications
  1. Biguanides
  2. Thiazolidinedione
  3. Sulfonylureas
  4. Alpha glucosidase inhibitor
  5. Insulin

### MONITOR

- FBS, HgbA1c
- Lipids
- BP
- Weight
- Lifestyle behavior

### GOAL

FBS  $\leq$  100  
HgbA1c  $\leq$  7.0%

### HYPERTENSION

- Medications
  1. Diuretic
  2. ACEI or ARB
  3. CCB
  4. BB

### MONITOR

- BP
- Lipids
- Weight
- Lifestyle behavior

### GOAL

BP  $\leq$  129/79 mm Hg

### DYSLIPIDEMIA

- Medications
  1. Statins
  2. Fibrate
  3. Nicotinic Acid
  4. Resins
  5. Ezetimibe

### MONITOR

- Lipids
- BP
- Weight
- Lifestyle behavior

### GOAL

LDL < 70  
Non HDL-C < 100  
TG < 150

# TREATMENT ALGORITHM FOR DIABETES

1. Diet/Exercise Counseling

2. Initiate glucose self-monitoring

3. Screen for target organ damage complications

4. Aspirin + Ace Inhibitors or ARB'S unless contraindicated

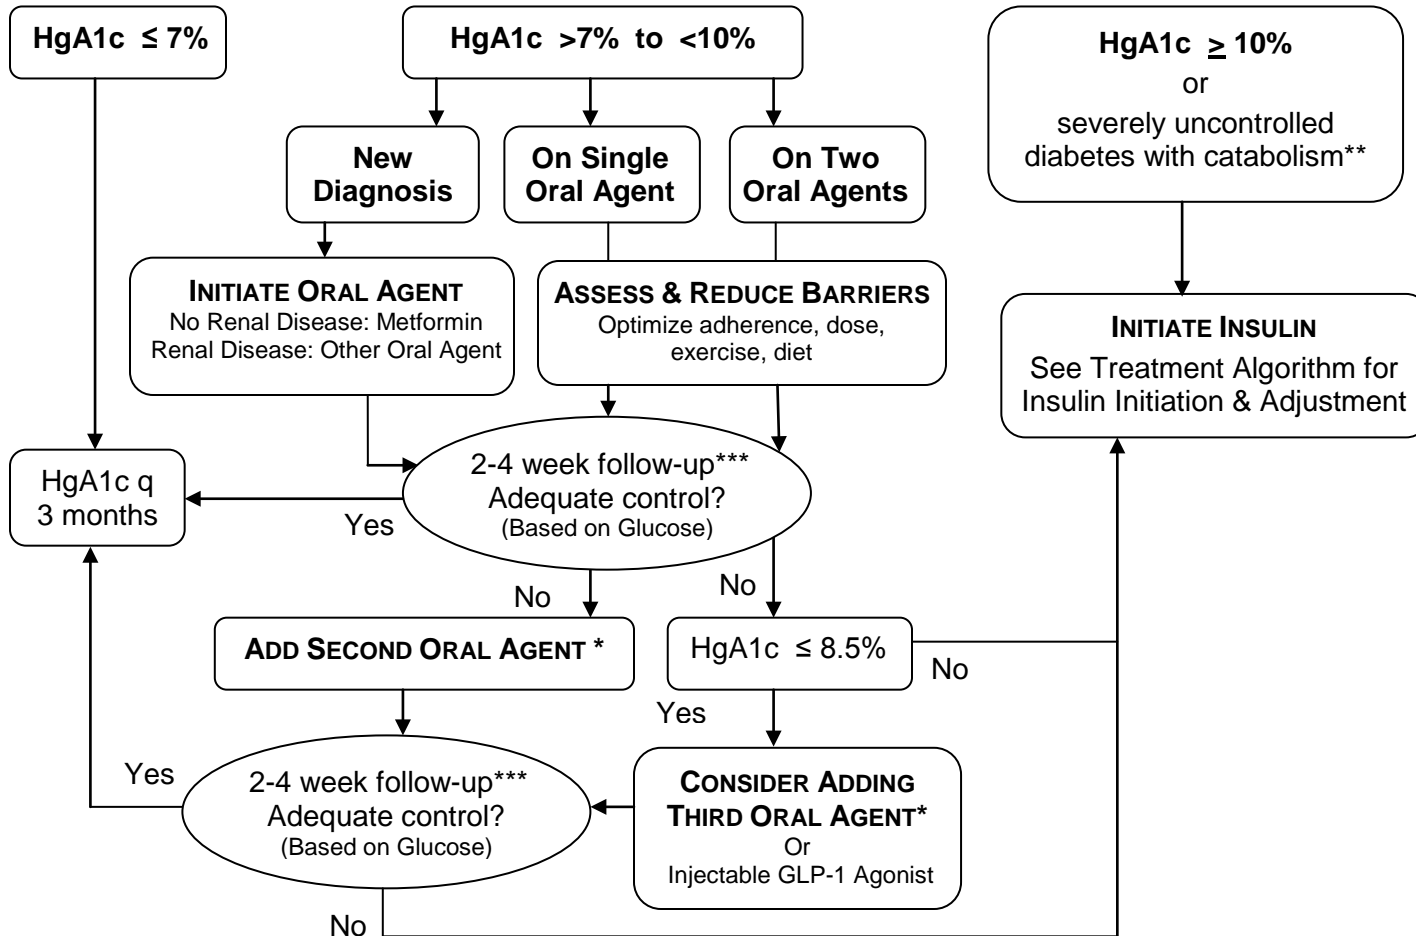

ACE-I OR ARB'S  
CONTRAINDICATIONS

1. Allergy
2. Pregnancy

ASPIRIN  
CONTRAINDICATIONS

1. Allergy
2. Ulcer
3. Pregnancy

\*OPTIONS FOR ORAL AGENTS

1. Metformin
2. Sulfonylureas
3. Thiazolidinedione
- 4-5. DPP-4 Inhibitor
- 4-5. Glinide
- 6-7. Alpha-glucosidase inhibitor
- 6-7. Colesevelam

**\*\*INDICATIONS OF SEVERELY UNCONTROLLED DM**

- Fasting glucose >250
- Random glucose consistently >300
- A1c > 10%
- Ketonuria
- Symptomatic: polyuria, polydipsia & weight loss.

**RENAL DISEASE**

- eGFR <60ml/min/1.73m<sup>2</sup>
- Cr >1.5 in men  
>1.3 in women
- Albuminuria >300mg/day  
(or 200mg albumin per gram of creatinine)

\*\*\*12 weeks needed to determine effectiveness of Thiazolidinedione

# TREATMENT ALGORITHM FOR HIGH BLOOD PRESSURE WITHOUT DM, CAD AND/OR RENAL DISEASE

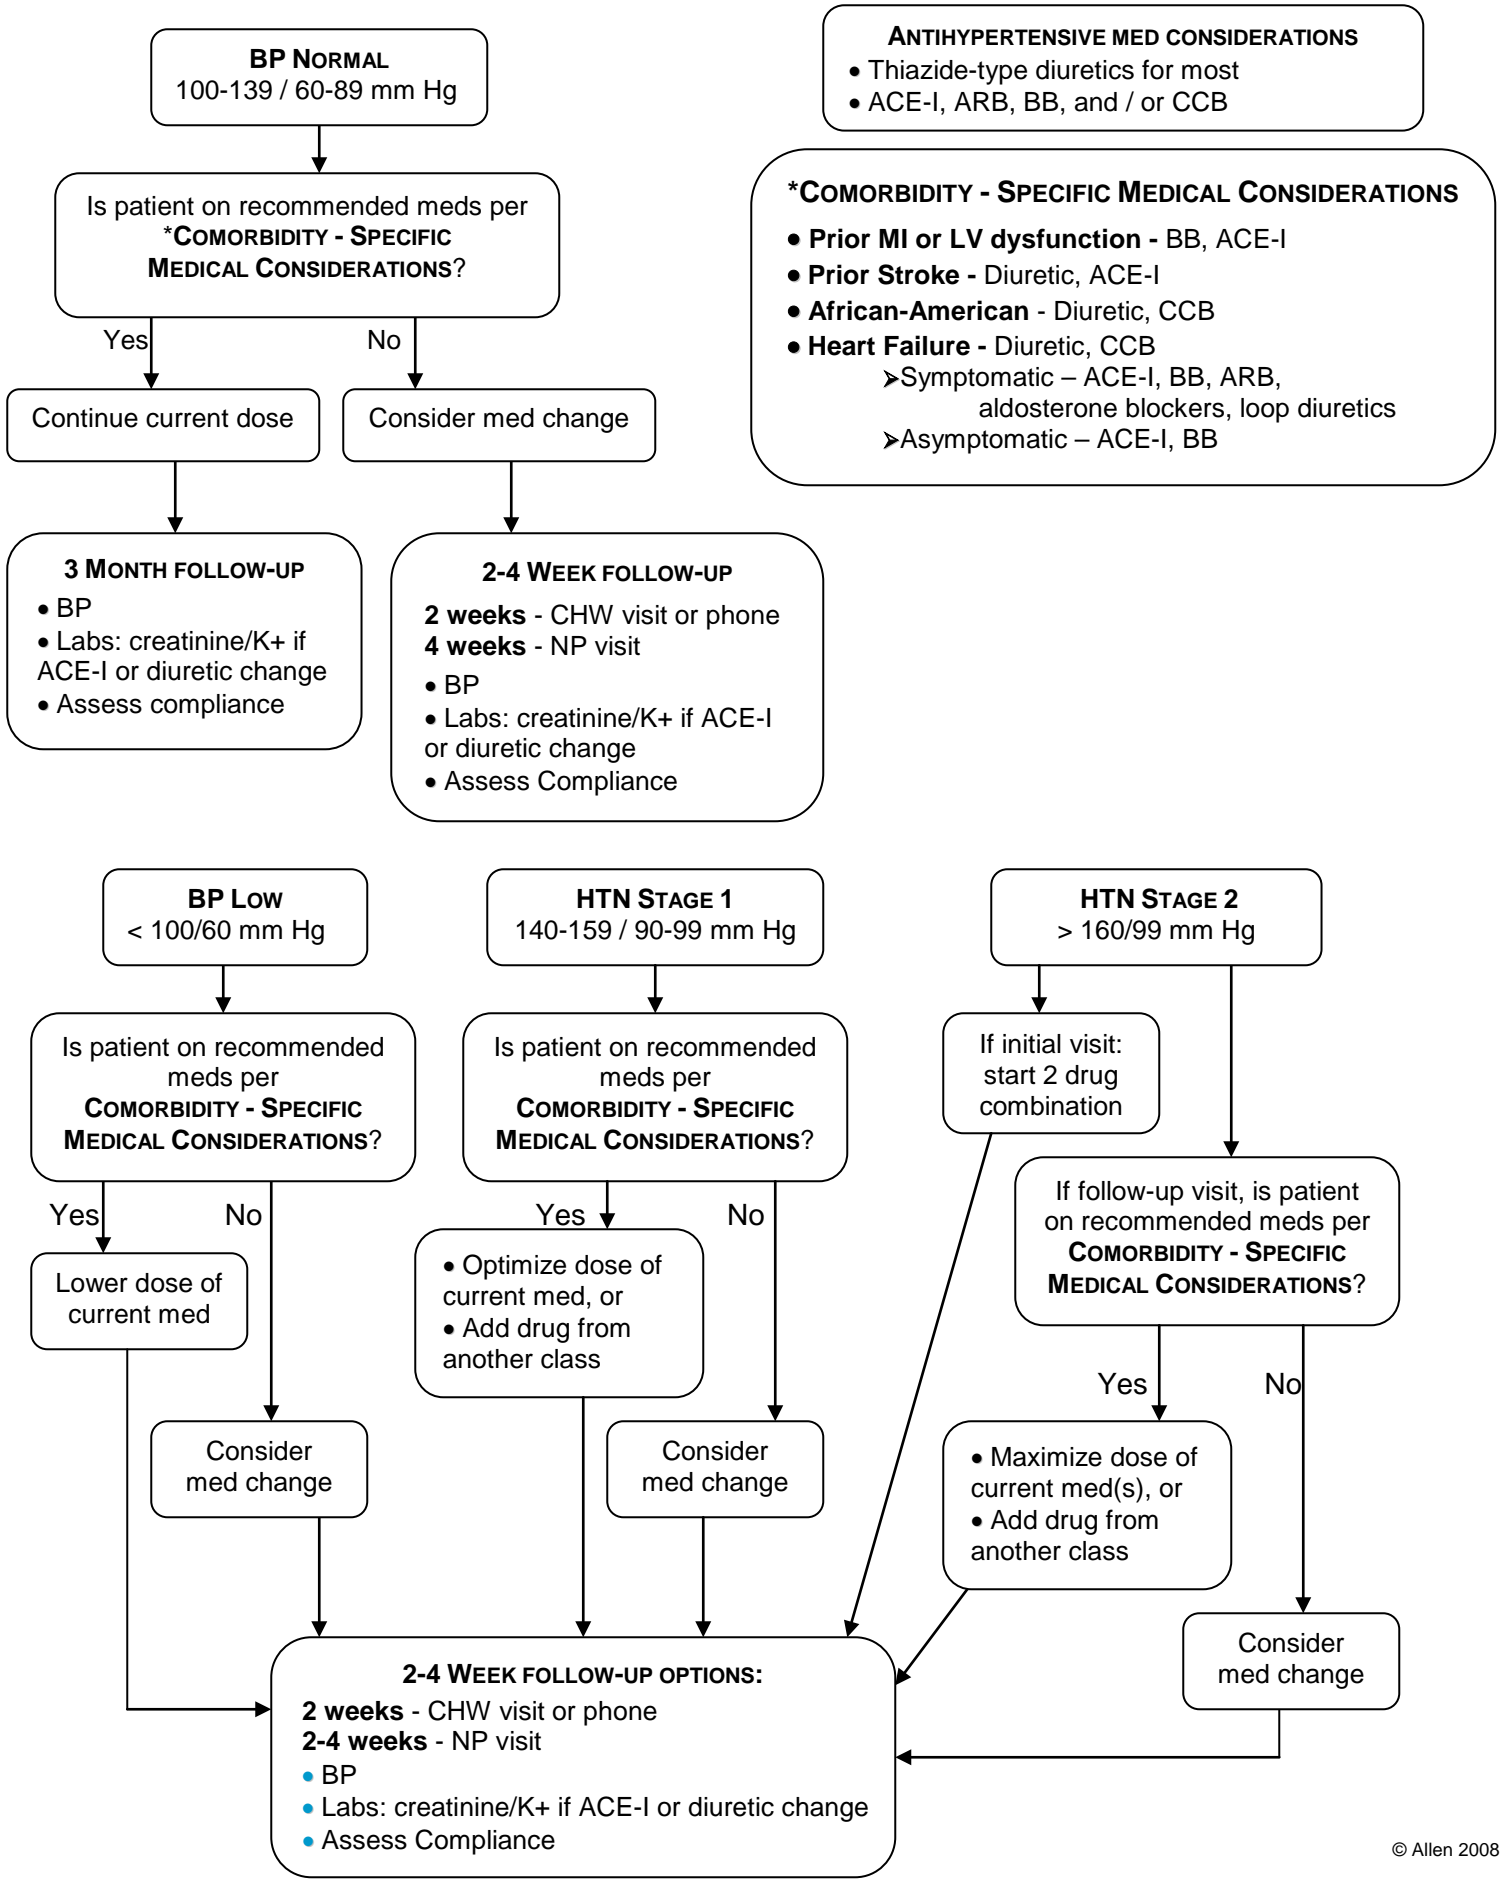

- ANTIHYPERTENSIVE MED CONSIDERATIONS**
- Thiazide-type diuretics for most
  - ACE-I, ARB, BB, and / or CCB

- \*COMORBIDITY - SPECIFIC MEDICAL CONSIDERATIONS**
- Prior MI or LV dysfunction - BB, ACE-I
  - Prior Stroke - Diuretic, ACE-I
  - African-American - Diuretic, CCB
  - Heart Failure - Diuretic, CCB
    - Symptomatic – ACE-I, BB, ARB, aldosterone blockers, loop diuretics
    - Asymptomatic – ACE-I, BB

# TREATMENT ALGORITHM FOR HIGH BLOOD PRESSURE WITH DM, CAD AND/OR RENAL DISEASE

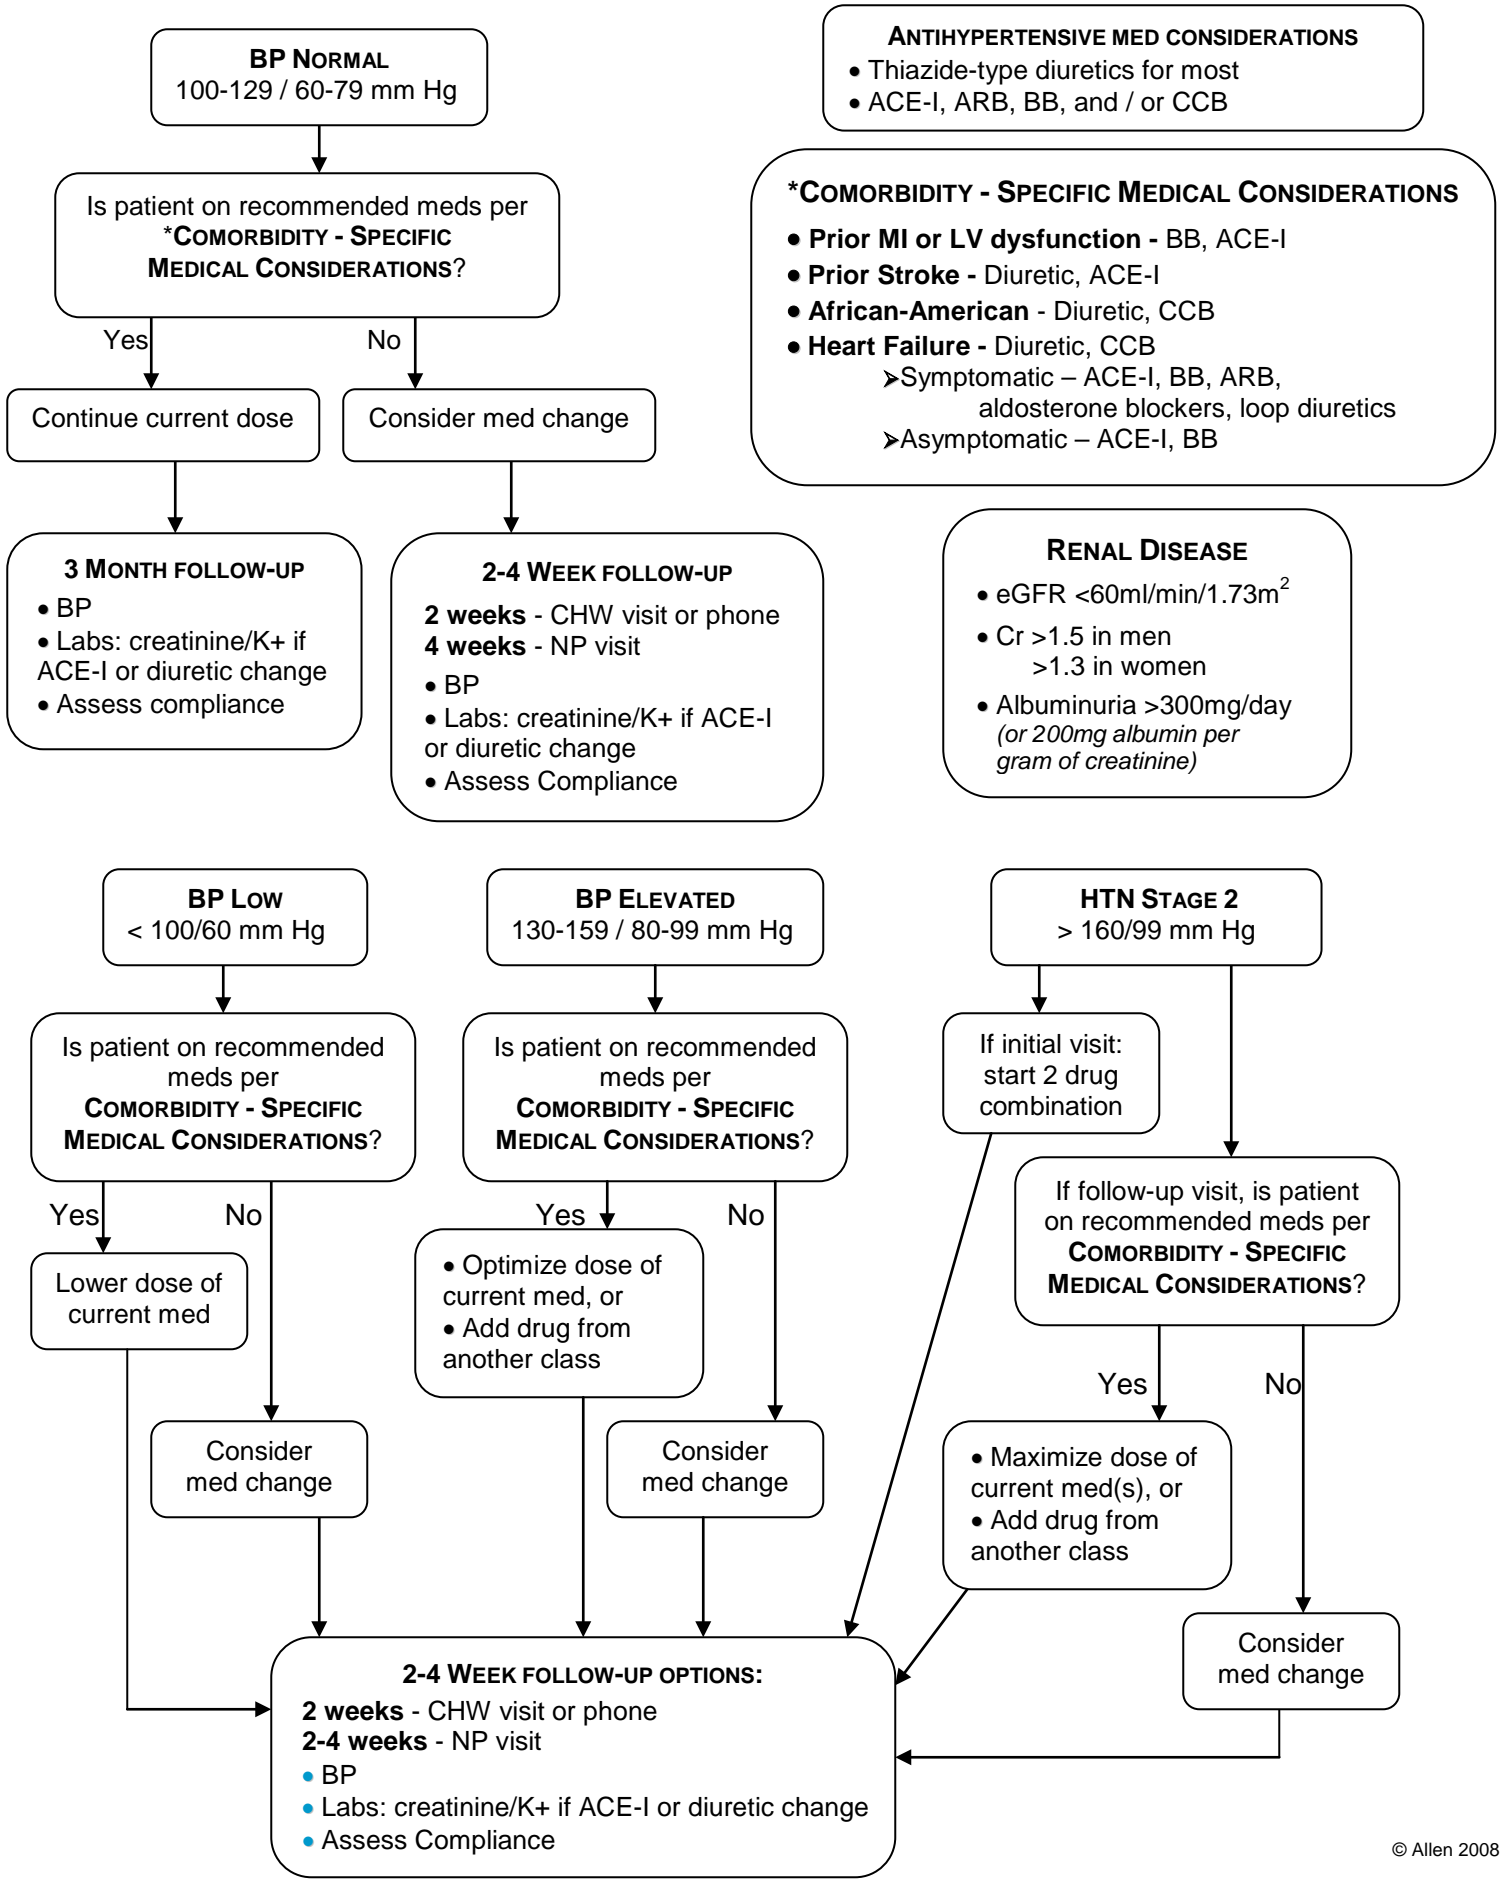

- ANTIHYPERTENSIVE MED CONSIDERATIONS**
- Thiazide-type diuretics for most
  - ACE-I, ARB, BB, and / or CCB

- \*COMORBIDITY - SPECIFIC MEDICAL CONSIDERATIONS**
- Prior MI or LV dysfunction - BB, ACE-I
  - Prior Stroke - Diuretic, ACE-I
  - African-American - Diuretic, CCB
  - Heart Failure - Diuretic, CCB
    - Symptomatic – ACE-I, BB, ARB, aldosterone blockers, loop diuretics
    - Asymptomatic – ACE-I, BB

- RENAL DISEASE**
- eGFR <60ml/min/1.73m<sup>2</sup>
  - Cr >1.5 in men  
>1.3 in women
  - Albuminuria >300mg/day  
(or 200mg albumin per gram of creatinine)

# TREATMENT ALGORITHM FOR INSULIN INITIATION AND ADJUSTMENT

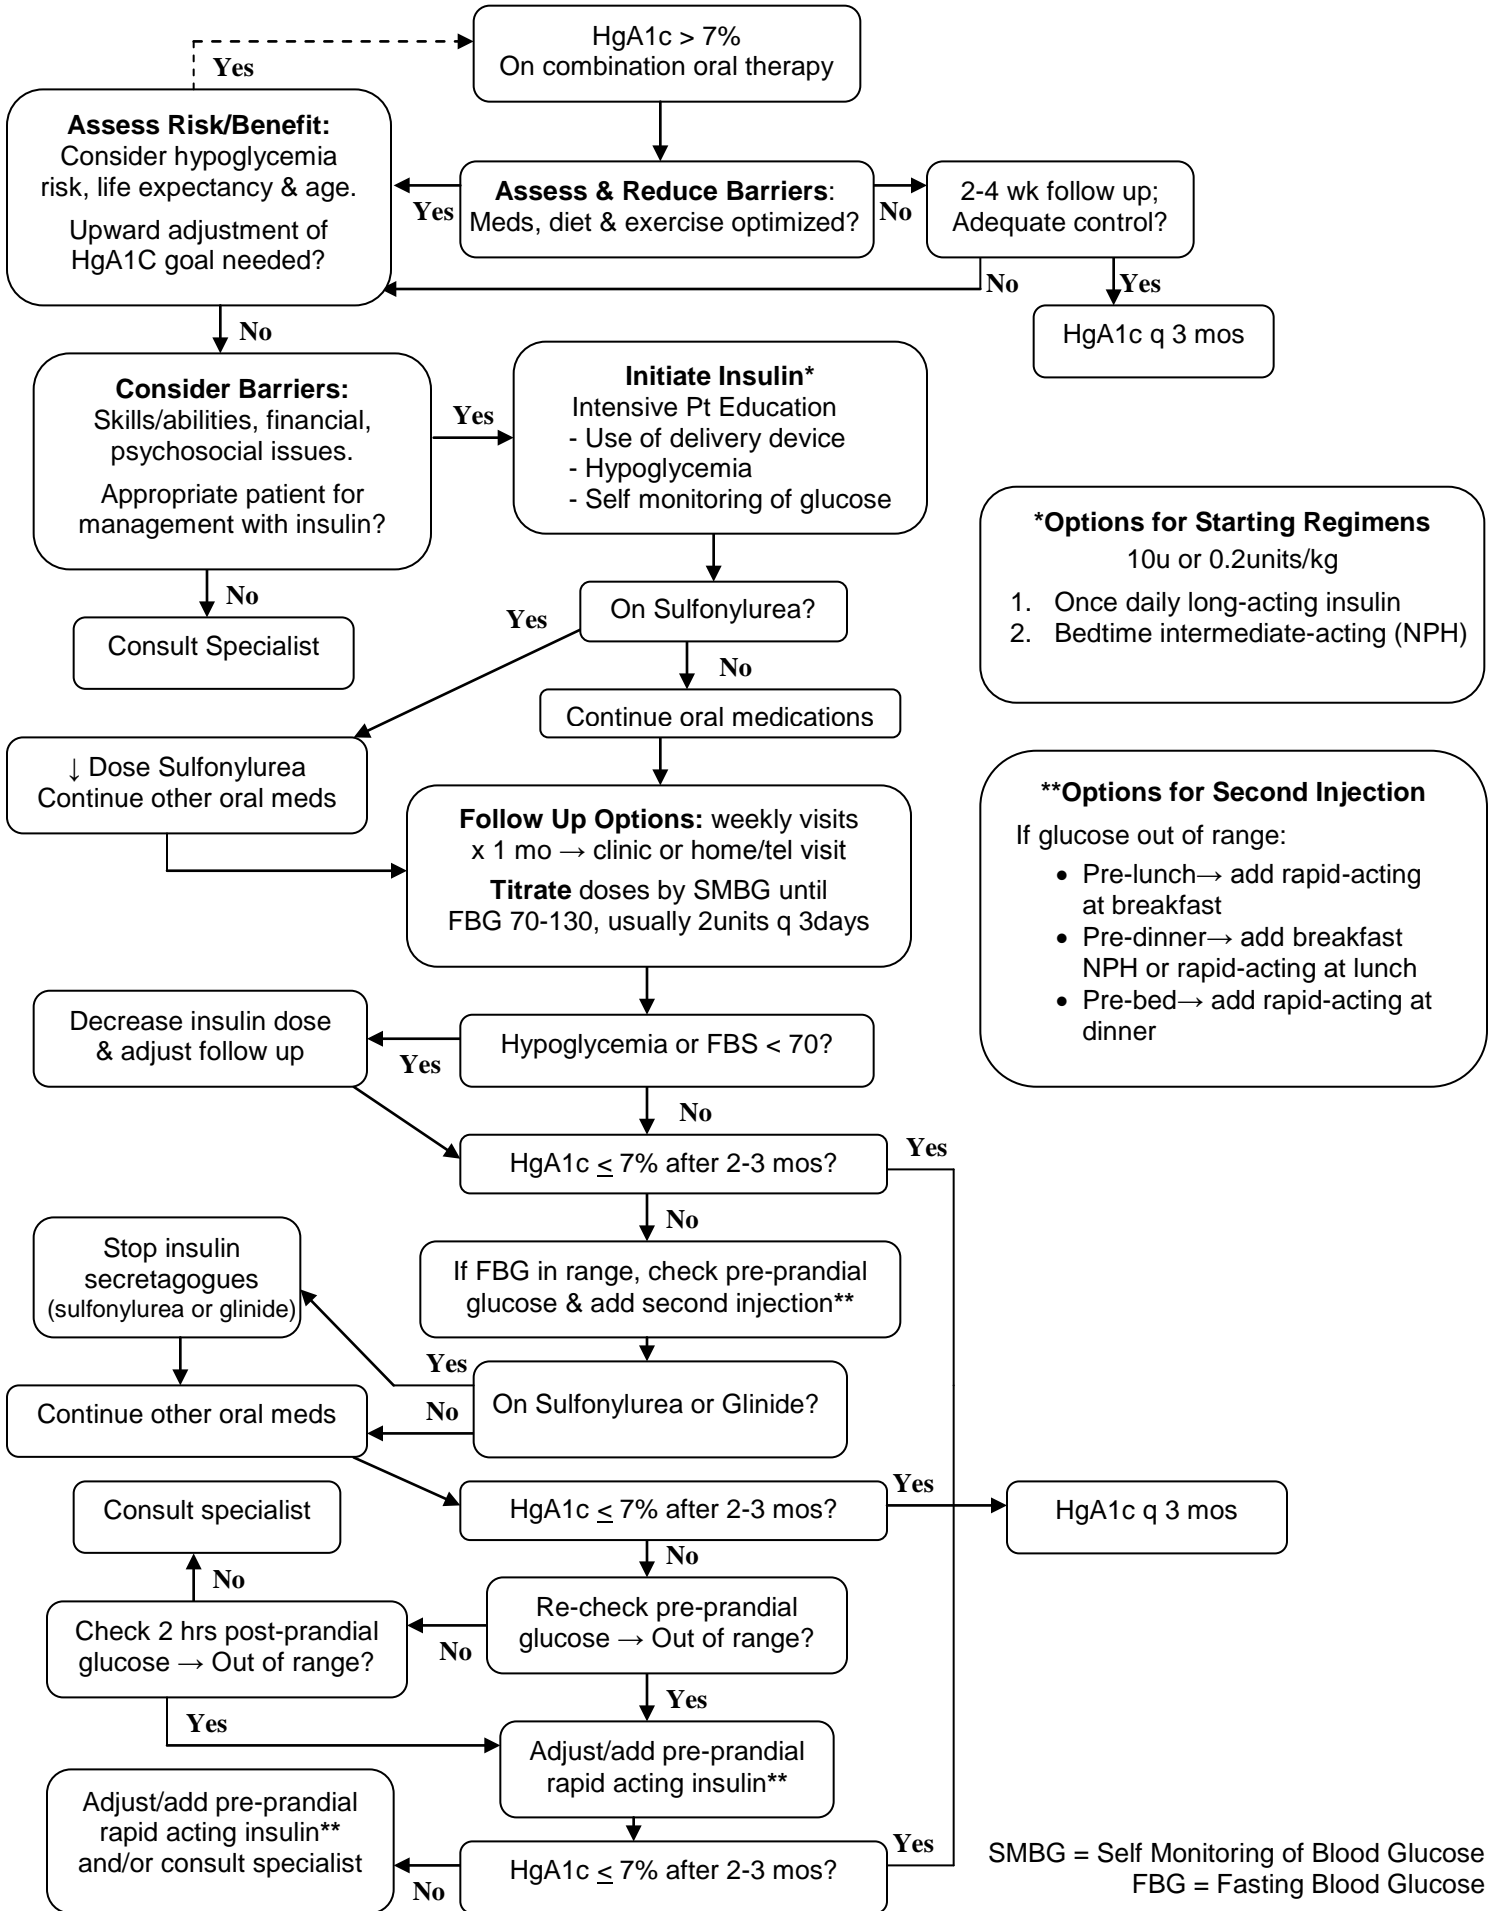

**\*Options for Starting Regimens**  
10u or 0.2units/kg

- Once daily long-acting insulin
- Bedtime intermediate-acting (NPH)

**\*\*Options for Second Injection**  
If glucose out of range:

- Pre-lunch → add rapid-acting at breakfast
- Pre-dinner → add breakfast NPH or rapid-acting at lunch
- Pre-bed → add rapid-acting at dinner

SMBG = Self Monitoring of Blood Glucose  
FBG = Fasting Blood Glucose

# TREATMENT ALGORITHM FOR ANTIHYPERLIPIDEMIC DRUG THERAPY

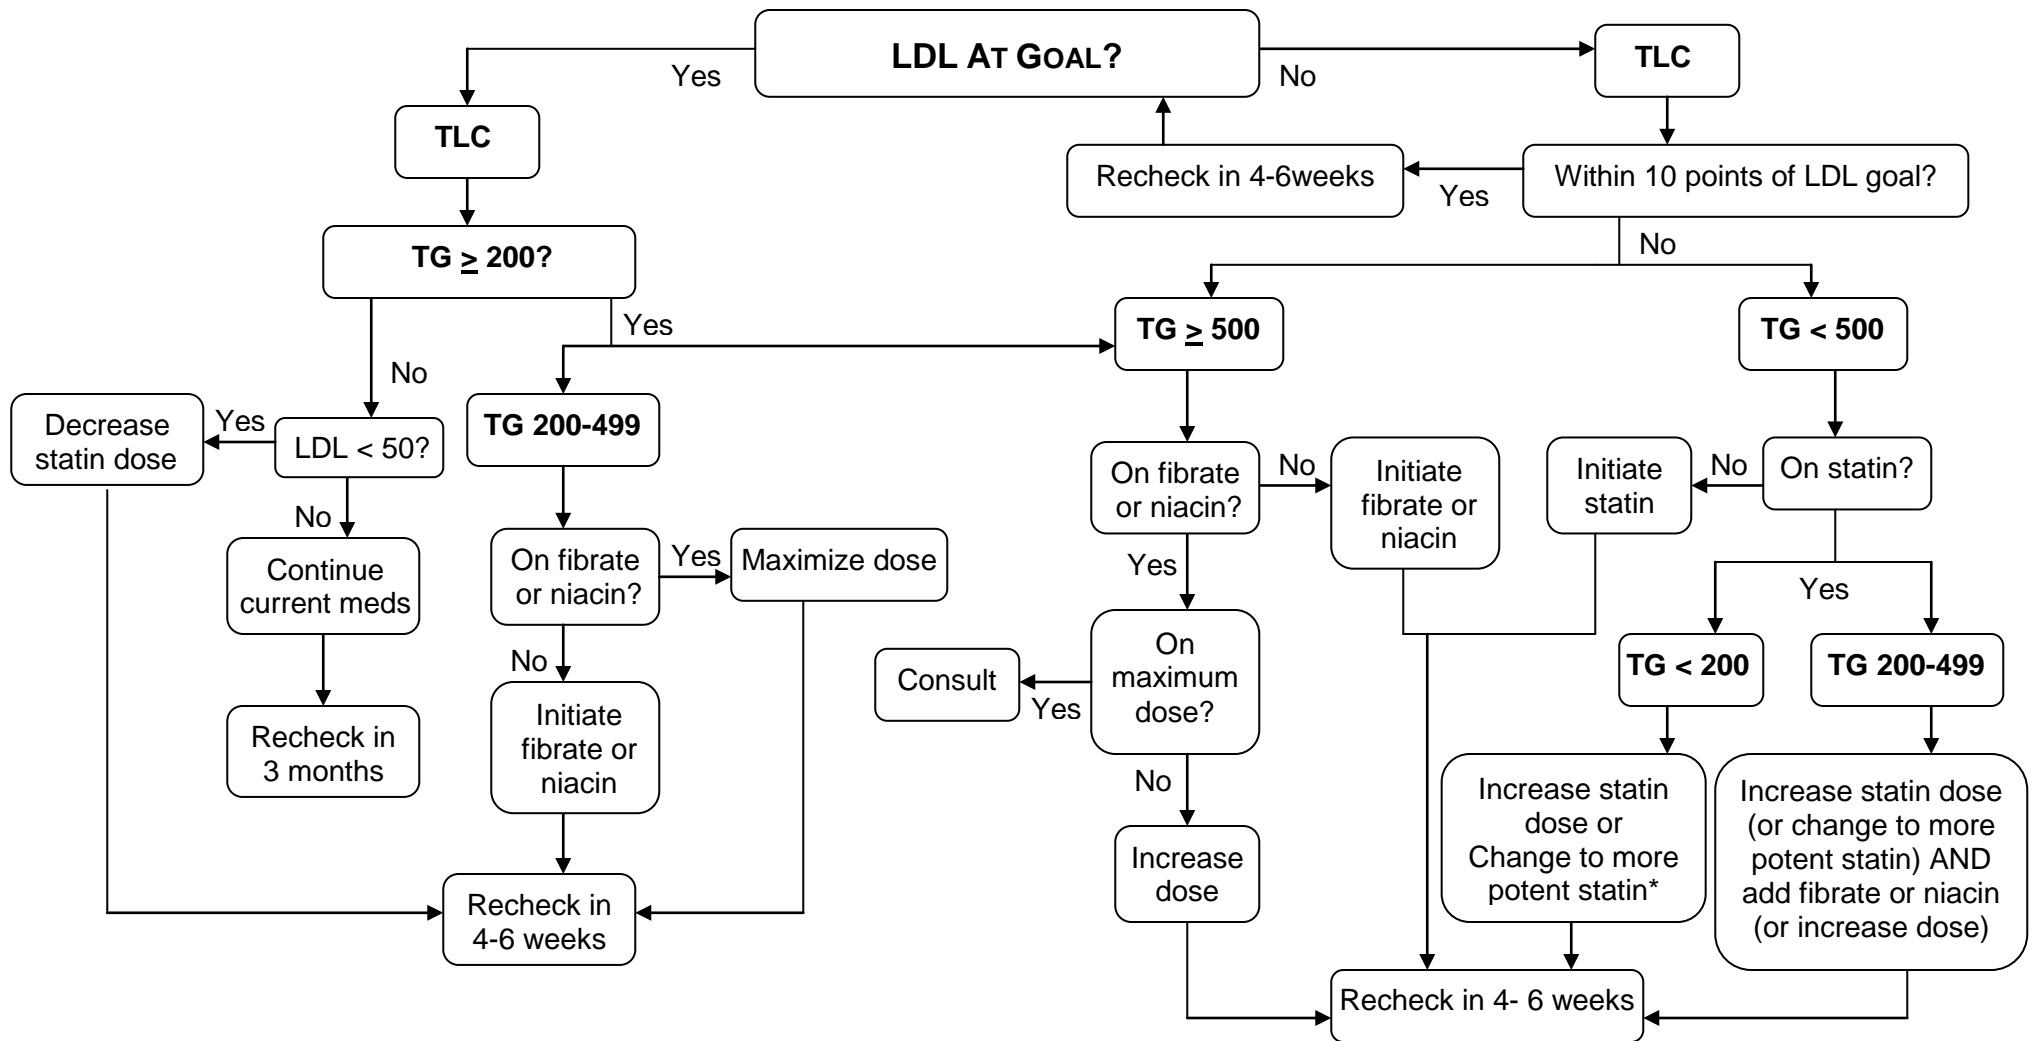

**FOR DIABETICS:**

- If TG > 150, optimize glycemic control concurrently with lipid-lowering drug therapy.
- Fibrate preferred over niacin.

|                        | <b>LDL Goals:</b>                  |             |
|------------------------|------------------------------------|-------------|
| <b>High Risk:</b>      | CHD or CHD risk equivalent         | <70         |
| <b>Mod. High Risk:</b> | 2+ risk factors (10yr risk 10-20%) | <130 (<100) |
| <b>Moderate Risk:</b>  | 2+ risk factors (10yr risk <10%)   | <130        |
| <b>Lower Risk:</b>     | 0-1 risk factor                    | <160        |

\***Non-HDL-C** is used for TG ≥ 200 or if sample drawn non-fasting.  
**TLC** = Therapeutic Lifestyle Change  
 \***Maximize statin use** prior to use of ezetimibe or other second line treatment



## Figure Legend

Figure 1. CONSORT diagram of COACH Trial

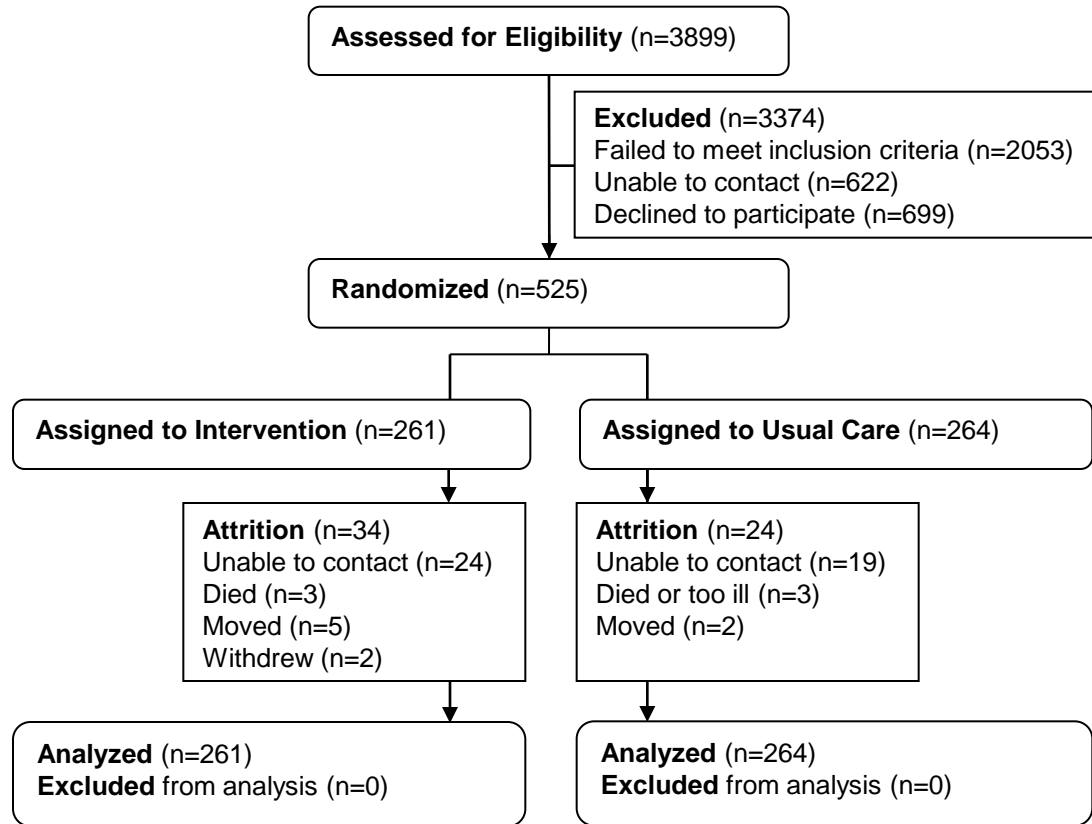

**School of Nursing**

Center for Nursing Research  
And Sponsored Projects  
525 N. Wolfe Street / Room 535  
Baltimore, Maryland 21205-2110

August 11, 2011

Jerilyn Allen, RN, ScD, FAAN  
525 N. Wolfe Street  
Room 534  
Baltimore, MD 21205

Dear Dr. Allen,

I hereby give you permission to be named in the acknowledgement section of your journal article "COACH Trial: A Randomized Controlled Trial of Nurse Practitioner/Community Health Worker Cardiovascular Disease Risk Reduction in Urban Community Health Centers", manuscript ID# CIRCCVOQ/2011/961573.

Please let me know if you need anything further.

Sincerely,

  
Margaret Denny
